# Supplementary material for: Adh enhances Actinobacillus pleuropneumoniae pathogenicity by binding to OR5M11 and activating p38 which induces apoptosis of PAMs and IL-8 release
Source: PubMed Central journal article supplement (PMC4820727; doi:10.1038/srep24058), 2016-04-05
Supplement: srep24058-s1.pdf [file srep24058-s1.pdf]

**Adh enhances *Actinobacillus pleuropneumoniae* pathogenicity by binding to OR5M11 and activating p38 which induces apoptosis of PAMs and IL-8 release**

Lei Wang<sup>a,b</sup>, Wanhai Qin<sup>a</sup>, Jing Zhang<sup>c</sup>, Chuntong Bao<sup>a</sup>, Hu Zhang<sup>a</sup>, Yanyi Che<sup>a</sup>, Changjiang Sun<sup>a</sup>, Jingmin Gu<sup>a</sup>, Xin Feng<sup>a</sup>, Chongtao Du<sup>a</sup>, Wenyu Han<sup>a</sup>, Langford Paul Richard<sup>d</sup>, Liancheng Lei<sup>a\*</sup>

<sup>a</sup> College of Veterinary Medicine, JiLin University, Changchun, P. R. China

<sup>b</sup> College of Animal Science, Henan Institute of Science and Technology, Xinxiang, P. R. China

<sup>c</sup> Changchun University of Chinese Medicine, Changchun, P. R. China

<sup>d</sup> Section of Paediatrics, Imperial College London, London, UK

Supplementary figure 1

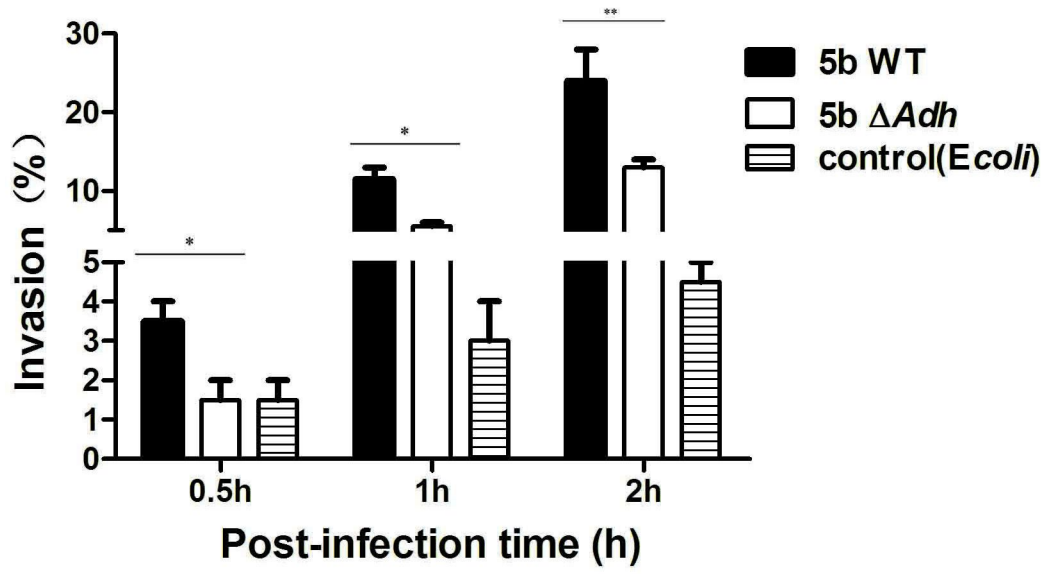

Supplement Fig S1: Invasion of *A. pleuropneumoniae* 5b WT and 5b  $\Delta Adh$  to PAMs.

Supplementary figure 2

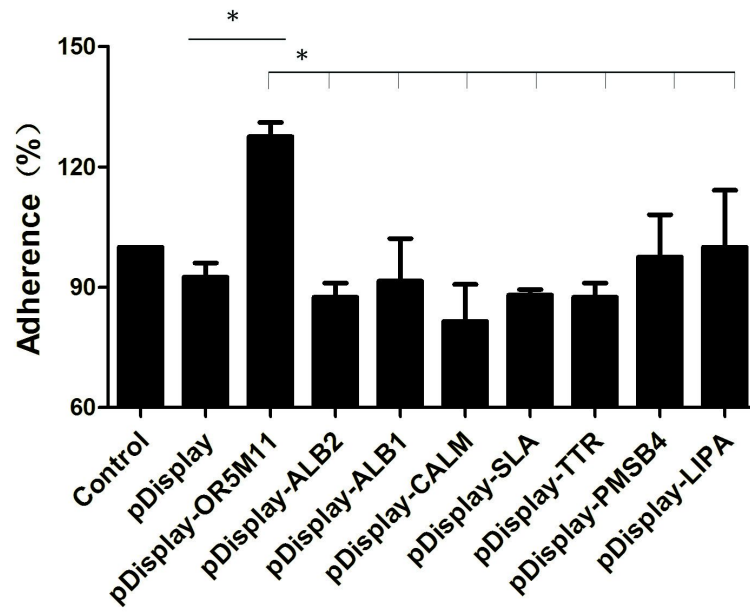

Supplement Fig S2: The expression of ALB2 ALB1 CALM SLA TTR PMSB4 LIPA on the adhesion of *A. pleuropneumoniae*

Supplementary figure 3

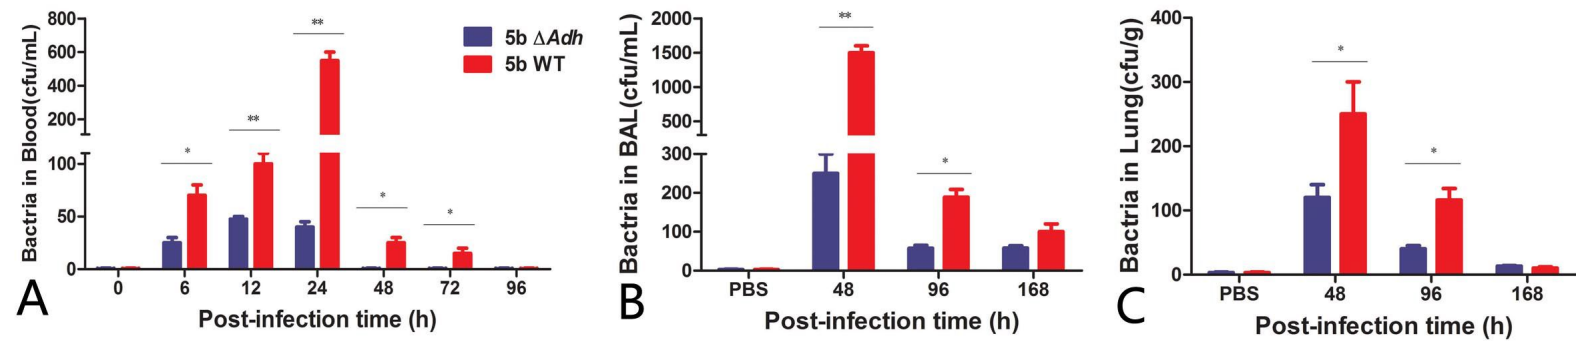

Supplement Fig S3: *A. pleuropneumoniae* colonization in the lung, blood and bronchoalveolar lavage fluid.

Supplementary figure 4

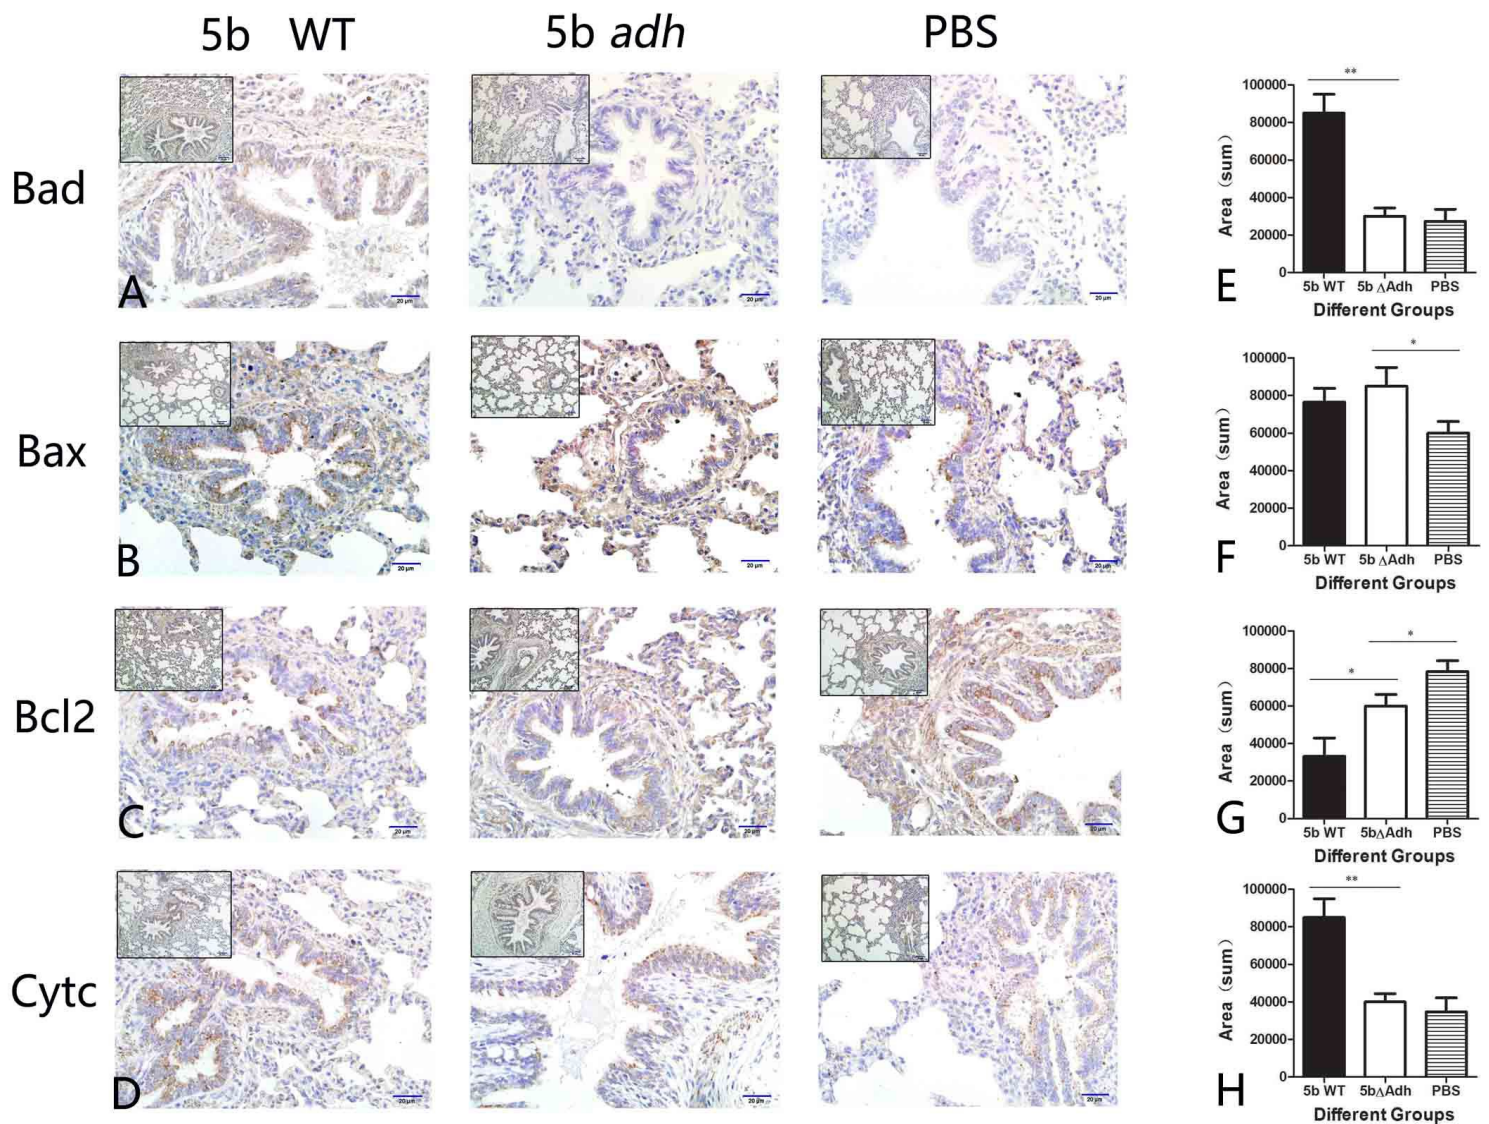

Supplement Fig S4: The expression levels of Bad, Bax, Bcl2 and Cytc in the lungs of piglets infected with *A. pleuropneumoniae*, assessed immunohistochemically.

Supplementary figure 5

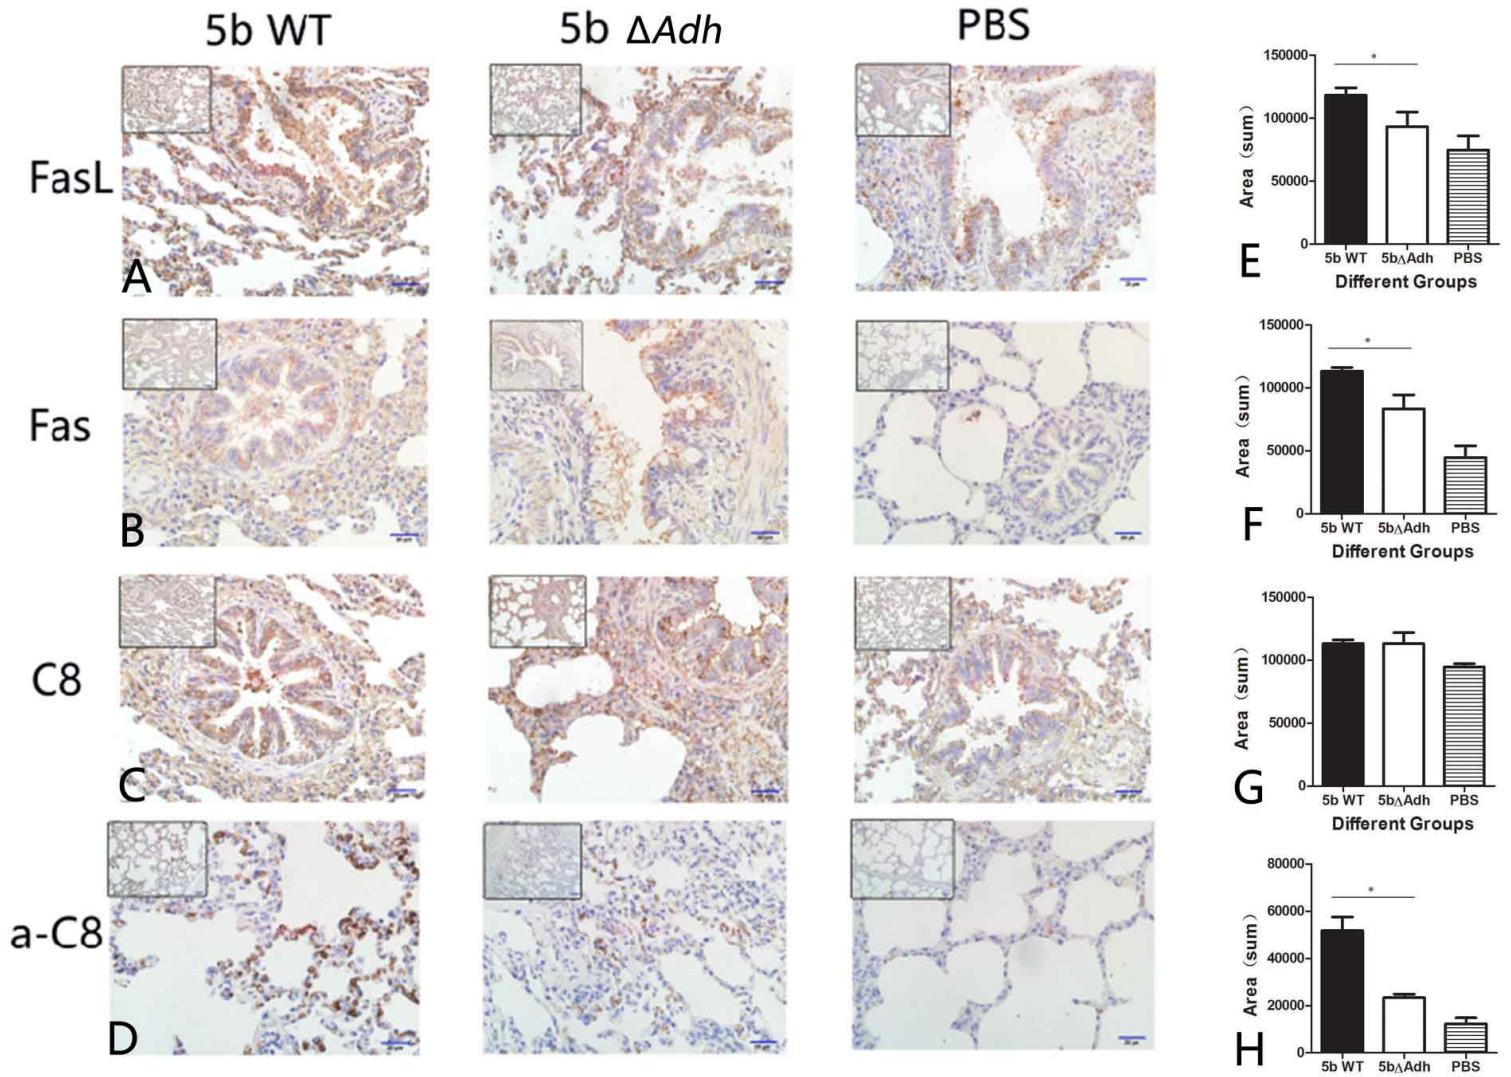

Supplement Fig S5: The expression levels of FasL, Fas, caspase-8, and activated caspase-8 in the lungs of piglets infected with *A. pleuropneumoniae*, assessed immunohistochemically.

Supplementary Table S1: The primers of porcine cytokines and apoptosis related gene for quantitative RT-PCR detection

| Genes          | Sequence                                                                 |
|----------------|--------------------------------------------------------------------------|
| IL-1 $\beta$   | F: 5'- AGTGGAGAAGCCGATGAAGA -3'<br>R: 5'- CATTGCACGTTTCAAGGATG -3'       |
| IL-6           | F: 5'- CCTCTCCGGACAAAAGTAA -3'<br>R: 5'- TCTGCCAGTACCTCCTTGCT -3'        |
| IFN-g          | F: 5'- TCAGAGCCACATTGTCTCCTTC-3'<br>R: 5'- CATTCAAGTTTCCCAGTGCTACCA-3'   |
| IL-8           | F: 5'- TGTGAGGCTGCAGTTCTGGCAAG -3'<br>R: 5'- GGGTGGAAAGGTGTGGAATGCGT -3' |
| IFN- $\beta$   | F: 5'-CTCTCCTGATGTGTTTCTCC-3'<br>R: 5'-GTTTCATCCTATCTTCGAGGC-3'          |
| TNF-a          | F: 5'- CCACGCTCTTCTGCCTACTGC-3'<br>R: 5'- CTCGGCTTTGACATTGGCTAC-3'       |
| IL-10          | F:5'-GCTGCGGCGCTGTCATCAATT-3'<br>R:5'- ACCCATGGCTTTGTAGACACCCC -3'       |
| CCL2           | F:5'-CAGGTCCTTGCCCAGCCAGATG -3'<br>R:5'- CACAGATCTCCTTGCCCCGCGA -3'      |
| CCL4           | F:5'-TCCCACCTCCTGCTGCTTACAT -3'<br>R:5'- GCCTGCCCTTTTTGGTCTGGAA -3'      |
| TNF-aR1        | F: 5'- CGCATCGCCGTCTCCTACCA -3'<br>R: 5'- GCCCAGATTCAGCAAAGTCCAGAT -3'   |
| TNF-aR2        | F: 5'-GCCTTGCCTTCTATCCTTTATC-3'<br>R: 5'-CGTATCTCCACCAACACCCTAT-3'       |
| caspase-1      | F: 5'-GCGTATTCAGAGCCGAGAGGGAG-3'<br>R:5'-CAGATTATGAGGGCAAGGCGTGT-3'      |
| caspase-3      | F: 5'-GTGGGATTGAGACGGACAGTGGG-3'<br>R:5'-CGCTGGACAAAGTGAAGTGGATGA-3'     |
| caspase-8      | F: 5'-GAGACAAGGGCATCATCTACGGC-3'<br>R:5'-TGGGTTTACCACGAAGGGAAGG-3'       |
| Fas            | F: 5'-TATCGAAGAAACCAAATAGAC-3'<br>R:5'-CGGAGCAGCTGGACTTTCTG-3'           |
| FasL           | F: 5'-CCCATACCCCCAAATCTTCT-3'<br>R:5'-CTGGACAGGGGAAGACTGAG-3'            |
| Caspase-9      | F: 5'- CCTTACCCTGCCTTACCTT-3'<br>R:5'- GCTGCCGCATCCTTCA-3'               |
| BAX            | F: 5'-CTCAAGCGCATTGGAGATGA-3'<br>R:5'-GTCCACGGCTGCGATCA-3'               |
| BCL-2          | F: 5'-CTTTGTCAGGCTTATGAAGGTT-3'<br>R:5'-TGTCTTTTGTCCATAATAATT-3'         |
| $\beta$ -catin | F: 5'-CCACCCAGAAGACTGTGGAT-3'<br>R:5'-AAGCAGGGATGATGTTCTGG-3'            |

Supplementary Table S2: The primers used for qRT-PCR verification of cytokines of mice infected by APP

| <b>Genes</b>   | <b>Sequence</b>                     |
|----------------|-------------------------------------|
| IL-1 $\beta$   | F: 5'-GAGCACCTTCTTTTCCTTCATCTT-3'   |
|                | R: 5'-TCACACACCAGCAGGTTATCATC-3'    |
| IL-6           | F: 5'- TGGATGGTCTTGGTCCTTAGCC-3'    |
|                | R: 5'- ACTGATGGTGACAACCACG-3'       |
| IL-12          | F: 5'- GTGAACCTCACCTGTGACACGC-3'    |
|                | R: 5'- TGAATACTTCTCATAGTCCCTTTGG-3' |
| CXCL1          | F: 5'- CCTGGGATTCACCTCAA-3'         |
|                | R: 5'- TTCTGAACCAAGGGAGC -3'        |
| CXCL15         | F: 5'- CATCTTCGTCCGTCCT-3'          |
|                | R: 5'- TCCAAACACATCATACTCCC-3'      |
| TNF-a          | F: 5'-ATGAGCACAGAAAGCATGATCC-3'     |
|                | R: 5'-ACAAGCAGGAATGAGAAGAGG-3'      |
| $\beta$ -Actin | F: 5'-ATCTACGAGGGCTATGCTCTCC-3'     |
|                | R: 5'-CTGATCCACATCTGCTGGAAGG-3'     |



Supplementary Table S3: The plain appraisal results of target proteins could interact with Adh

| Order | Gene Name | Function                                         | CoverPercent | MW        |
|-------|-----------|--------------------------------------------------|--------------|-----------|
| 1     | KRT79     | PIG Uncharacterized protein                      | 14.39%       | 57900.92  |
| 2     | ALB       | PIG Serum albumin                                | 9.23%        | 69691.42  |
| 3     | HSAP2     | PIG Uncharacterized protein                      | 12.42%       | 69821.99  |
| 4     | IQGAP1    | Ras GTPase-activating-like protein               | 7.10%        | 149834.58 |
| 5     | RAB1B     | PIG Ras-related protein Rab-1B                   | 23.38%       | 22111.79  |
| 6     | IGHG      | PIG IgG heavy chain                              | 9.36%        | 51246.37  |
| 7     | SLA1      | PIG MHC class I antigen                          | 6.78%        | 33608.09  |
| 8     | SLA-DRA   | PIG MHC class II antigen                         | 6.35%        | 28425.43  |
| 9     | RAB14     | PIG Actin related protein 2/3 complex subunit 2  | 3.00%        | 34278.55  |
| 10    | C3        | PIG Complement C3                                | 0.36%        | 186804.62 |
| 11    | APOE      | PIG Apolipoprotein E                             | 2.84%        | 36598.86  |
| 12    | ITIH4     | PIG Inter-alpha-trypsin inhibitor heavy chain H4 | 1.09%        | 102144.97 |
| 13    | CARD      | PIG Uncharacterized protein                      | 0.90%        | 112804.06 |
| 14    | CALM1     | PIG Calmodulin 1                                 | 15.58%       | 8893.76   |
| 15    | PSMB4     | PIG Proteasome subunit                           | 3.79%        | 29052.77  |
| 16    | OR5M11    | PIG Olfactory receptor                           | 12.18%       | 36138.69  |
| 17    | TTR       | PIG Transthyretin                                | 4.00%        | 16081.27  |
| 18    | FGF7      | PIG Fibroblast growth factor 7                   | 5.15%        | 22462.9   |
| 19    | CARD4     | PIG Caspase recruitment domain member 4          | 0.91%        | 62080.92  |
| 20    | NOD1      | PIG Nucleotide-binding oligomerization domain 1  | 0.52%        | 107542.33 |
| 21    | ARHGEF2   | PIG Rho guanine nucleotide exchange factor 2     | 0.73%        | 108481.85 |
| 22    | LIPA      | PIG Lipase                                       | 2.01%        | 45312.67  |
| 23    | ODZ4      | PIG Ficolin alpha                                | 3.10%        | 34681.25  |
| 24    | FCN2      | PIG Ficolin-2                                    | 0.58%        | 289365.34 |
